# Supplementary material for: Thiol modification of silicon-substituted hydroxyapatite nanocrystals facilitates fluorescent labelling and visualisation of cellular internalisation
Source: Royal Society of Chemistry journal article supplement (doi:10.1039/c3tb20775g), 2013-01-01
Supplement: c3tb20775g.pdf [file c3tb20775g.pdf]

## Supplementary Information

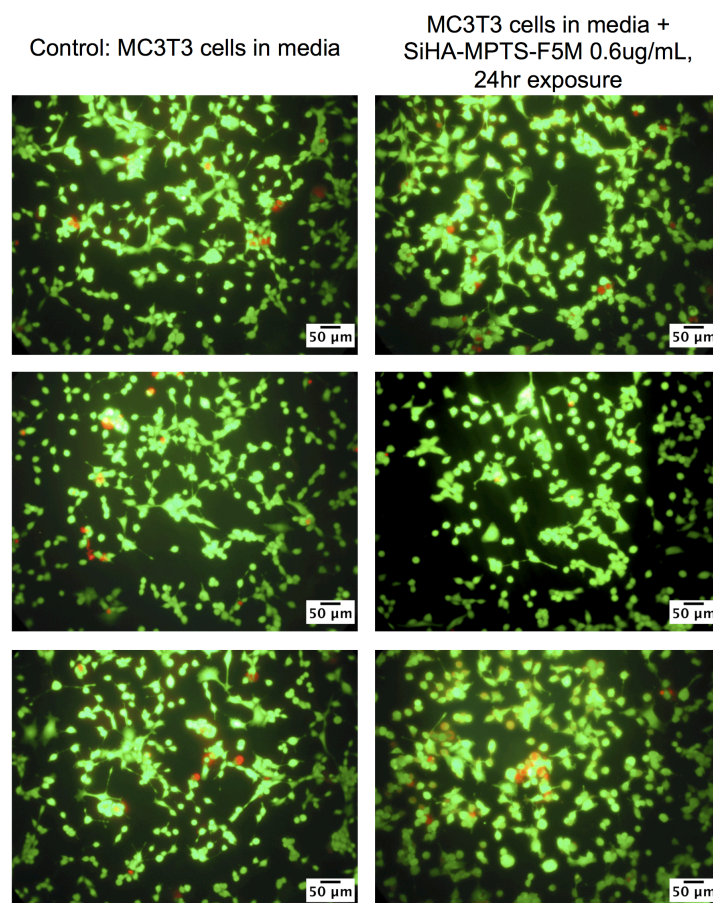

Figure S1: Live/dead assay performed on MC3T3 cells in media as a control (lefthand column) and MC3T3 cells exposed to 0.6ug/mL SiHA-MPTS-F5M for 24 hours (righthand column). Three images were taken at different locations across the slide for both samples.

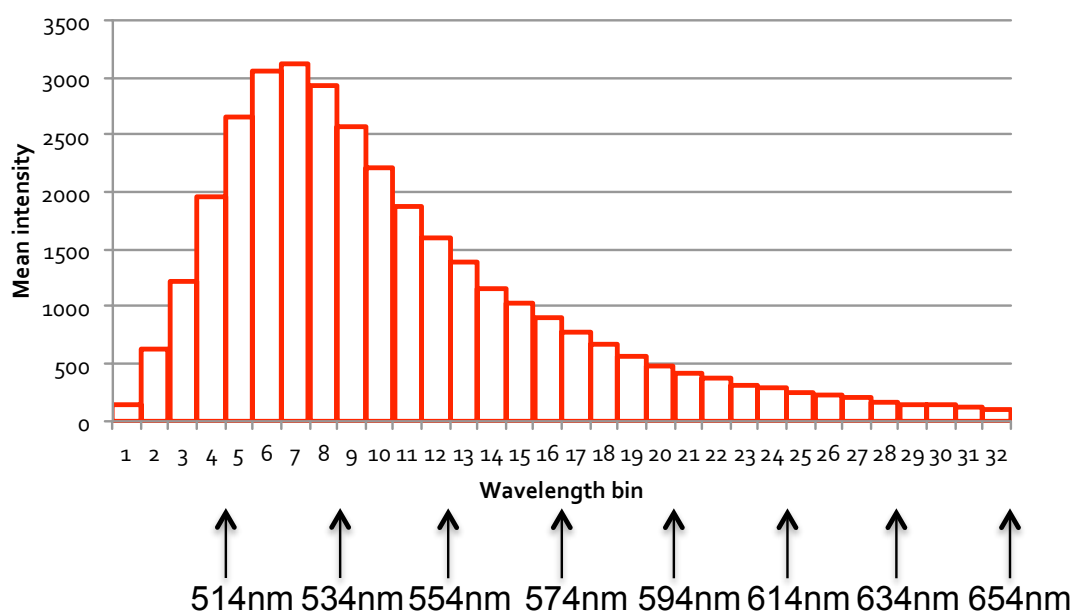

Figure S2: Fluorescence profile of SiHA-MPTS-F5M obtained during confocal fluorescence imaging of the particles. Detection range: 494-654nm consisting of thirty-two 5nm wide bins.
